# Supplementary material
Source: PubMed Central journal article supplement (PMC4862925)
Supplement: NIHMS736447-supplement-supplement_1.pdf [file NIHMS736447-supplement-supplement_1.pdf]

**Supplemental Table 1.** Node-positive T1a gastric cancer patients by diagnosis period

|                            | <b>2002-2006</b> | <b>2007-2012</b> |                |
|----------------------------|------------------|------------------|----------------|
|                            | <b>N=383</b>     | <b>N=544</b>     |                |
|                            | <b>N (%)</b>     | <b>N (%)</b>     | <b>P value</b> |
| <b>Positive Node Group</b> |                  |                  |                |
| 0                          | 345 (90.1)       | 510 (93.8)       | .04            |
| 1+                         | 38 (9.9)         | 34 (6.2)         |                |

**Supplemental Table 2.** Node-positive T1a gastric cancer patients by race/ethnicity and diagnosis period

|                         | <b>2002-2006</b> | <b>2007-2012</b> |                |
|-------------------------|------------------|------------------|----------------|
|                         | <b>N=38</b>      | <b>N=34</b>      |                |
|                         | <b>N (%)</b>     | <b>N (%)</b>     | <b>P value</b> |
| <b>Race/Ethnicity</b>   |                  |                  | .18            |
| Non-Hispanic White      | 17 (44.7)        | 10 (29.4)        |                |
| Black                   | 9 (23.7)         | 7 (20.6)         |                |
| Hispanic White          | 3 (7.9)          | 9 (26.5)         |                |
| Asian/Pacific Islanders | 9 (23.7)         | 8 (23.5)         |                |
